# Supplementary material for: Simple manipulation of enzyme-linked immunosorbent assay (ELISA) using an automated microfluidic interface
Source: Royal Society of Chemistry journal article supplement (doi:10.1039/d2ay00326k), 2022-01-01
Supplement: d2ay00326k2.pdf [file d2ay00326k2.pdf]

## Supplementary information

### Simple manipulation of enzyme-linked immunosorbent assay (ELISA) using an automated microfluidic interface

Yosita Panraksa<sup>a,b,c‡</sup>, Ilhoon Jang<sup>d,e‡</sup>, Cody S. Carrell<sup>d</sup>, Anita G. Amin<sup>a</sup>, Orawon Chailapakul<sup>c\*</sup>,

Delphi Chatterjee<sup>a\*</sup> and Charles S. Henry<sup>d\*</sup>

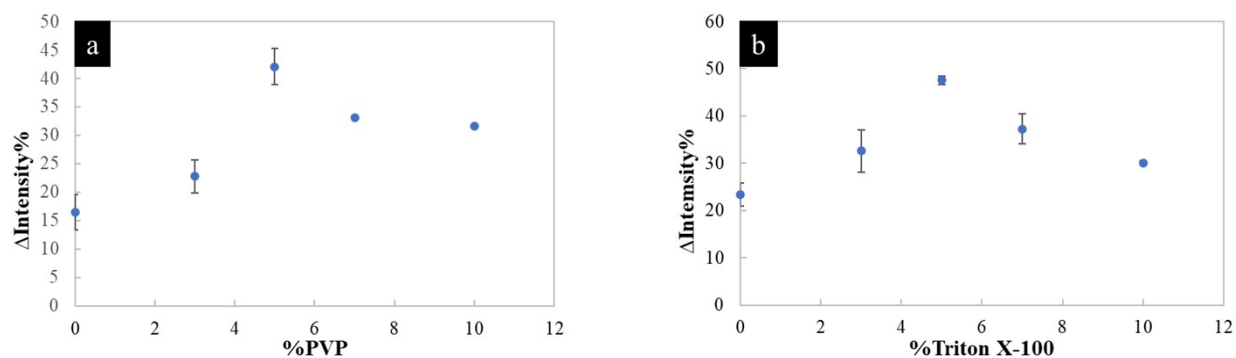

**Fig. S1.** Effect of (a) the amount of polyvinylpyrrolidone (%PVP) by fixing the amount of Triton X-100 at 2% and (b) the amount of Triton X-100 (%) by fixing the amount of PVP at 5% and LAM concentration at  $1 \mu\text{g mL}^{-1}$  on assay sensitivity.

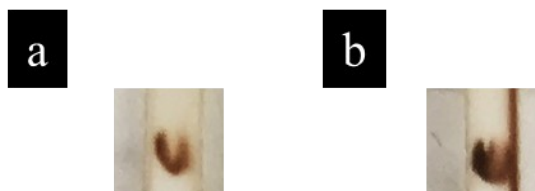

**Fig. S2.** Effect of H<sub>2</sub>O<sub>2</sub> form on signal intensity (a) dry and (b) fresh

**Video S1.** Flow characteristics in the device video. Green, blue, and yellow dyes were representative of detection Ab, DAB substrate, and H<sub>2</sub>O<sub>2</sub>, respectively
